# Supplementary material for: Parsimonious data: How a single Facebook like predicts voting behavior in multiparty systems
Source: PLOS journal article supplement (doi:10.1371/journal.pone.0184562), 2017-09-20

*S1 Fig. Log of post-likes per user in main sample used in models (N = 659)*

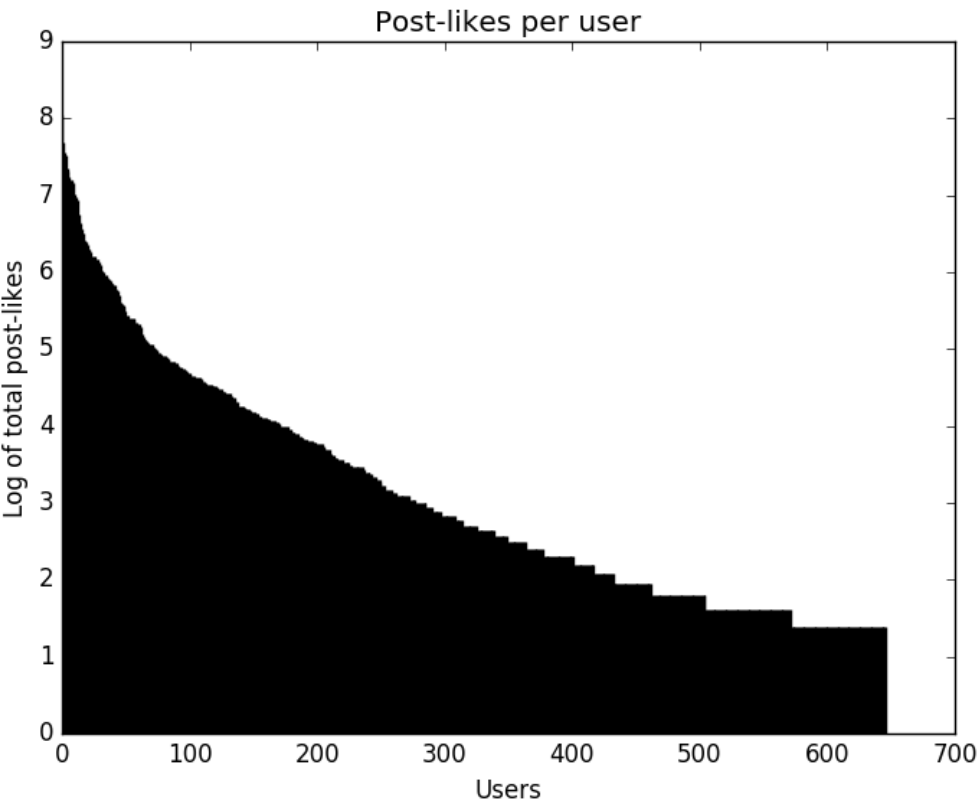

Supplement: S11 (10.1371/journal.pone.0184562.s011) [file journal.pone.0184562.s011]
